# Supplementary material for: Inverse Association between Organic Food Purchase and Diabetes Mellitus in US Adults
Source: MDPI journal article supplement (doi:10.3390/nu10121877), 2018-12-03
Supplement: s1 [file s1]

**Table S1.** Stratified analyses for the association between organic food purchase and diabetes among 8199 participants, NHANES 2007-2010 \*.

|                                          | No. of diabetes cases/participants | Ever purchased any organic food in the past 30 days |                  |                 |                          |
|------------------------------------------|------------------------------------|-----------------------------------------------------|------------------|-----------------|--------------------------|
|                                          |                                    | No                                                  | Yes              | <i>p</i> -value | <i>p</i> for interaction |
| <b>Age</b>                               |                                    |                                                     |                  |                 |                          |
| 20-45                                    | 141/3,392                          | 1.00<br>(reference)                                 | 1.18(0.74, 1.88) | 0.48            | 0.85                     |
| 45-65                                    | 565/2,910                          | 1.00<br>(reference)                                 | 0.69(0.49, 0.95) | 0.03            |                          |
| >65                                      | 512/1,897                          | 1.00<br>(reference)                                 | 0.74(0.56, 0.98) | 0.04            |                          |
| <b>Gender</b>                            |                                    |                                                     |                  |                 |                          |
| Male                                     | 577/3,815                          | 1.00<br>(reference)                                 | 0.81(0.63, 1.06) | 0.13            | 0.82                     |
| Female                                   | 641/4,384                          | 1.00<br>(reference)                                 | 0.82(0.63, 1.07) | 0.14            |                          |
| <b>Race/ethnicity</b>                    |                                    |                                                     |                  |                 |                          |
| White                                    | 490/4,114                          | 1.00<br>(reference)                                 | 0.76(0.60, 0.96) | 0.02            | 0.50                     |
| Non-white                                | 728/4,085                          | 1.00<br>(reference)                                 | 0.90(0.66, 1.23) | 0.50            |                          |
| <b>Education</b>                         |                                    |                                                     |                  |                 |                          |
| Less than high school                    | 456/2,183                          | 1.00<br>(reference)                                 | 0.89(0.61, 1.30) | 0.56            | 0.60                     |
| High school                              | 293/1,928                          | 1.00<br>(reference)                                 | 0.93(0.61, 1.41) | 0.73            |                          |
| College or above                         | 469/4,088                          | 1.00<br>(reference)                                 | 0.70(0.49, 1.01) | 0.06            |                          |
| <b>Ratio of family income to poverty</b> |                                    |                                                     |                  |                 |                          |
| ≤1.3                                     | 379/2,324                          | 1.00<br>(reference)                                 | 0.92(0.69, 1.22) | 0.56            | 0.85                     |
| >1.3-3.5                                 | 468/2,825                          | 1.00<br>(reference)                                 | 0.92(0.69, 1.23) | 0.57            |                          |
| >3.5                                     | 264/2,368                          | 1.00<br>(reference)                                 | 0.82(0.56, 1.20) | 0.31            |                          |
| <b>Physical activity, MET-min/week</b>   |                                    |                                                     |                  |                 |                          |
| <600                                     | 701/3,339                          | 1.00<br>(reference)                                 | 0.82(0.64, 1.06) | 0.13            | 0.58                     |

|                       |           |                     |                     |      |      |
|-----------------------|-----------|---------------------|---------------------|------|------|
| ≥600-1199             | 114/862   | 1.00<br>(reference) | 1.23(0.70,<br>2.16) | 0.46 |      |
| ≥1200                 | 403/3,998 | 1.00<br>(reference) | 0.68(0.49,<br>0.95) | 0.03 |      |
| <b>HET-2010 score</b> |           |                     |                     |      |      |
| Lower HEI-2010 score  | 603/4,313 | 1.00<br>(reference) | 0.94(0.79,<br>1.12) | 0.45 | 0.93 |
| Higher HEI-2010 score | 615/3,886 | 1.00<br>(reference) | 0.67(0.50,<br>0.90) | 0.01 |      |

\*Adjusted for age, gender, race/ethnicity, education, ratio of family income to poverty, family history of diabetes, smoking status, alcohol intake, physical activity, total energy intake, HEI-2010 score and BMI. All of the covariates were either continuous or categorized as in table 1.

**Table S2.** Association between organic food purchase and diabetes among 7221 participants (excluding those with already diagnosed diabetes), NHANES 2007-2010.

|                                    | Ever purchased any organic food in the past 30 days |                     |                 |
|------------------------------------|-----------------------------------------------------|---------------------|-----------------|
|                                    | No                                                  | Yes                 | <i>p</i> -value |
| No. of diabetes cases/participants | 177/4,602                                           | 63/2,619            |                 |
| Model 1 †                          | 1.00 (reference)                                    | 0.52 (0.36, 0.75) * | 0.001           |
| Model 2 ‡                          | 1.00 (reference)                                    | 0.67 (0.46, 0.99)   | 0.04            |
| Model 3 §                          | 1.00 (reference)                                    | 0.68 (0.46, 1.01)   | 0.052           |

\*Odds ratio (95% confidence intervals). † Multivariable model 1: adjusted for age (years) and gender. ‡ Multivariable model 2: multivariable model 1 plus race/ethnicity, education, ratio of family income to poverty, family history of diabetes, smoking status, alcohol intake, physical activity, total energy intake, and HEI-2010 score. § Multivariable model 3: multivariable model 2 plus BMI. All of the covariates were either continuous or categorized as in table 1.

**Table S3.** Association between organic food purchase and diabetes among 7919 participants excluding those who were suspected type 1 diabetes (diagnosed with diabetes under age 30, started insulin within 1 year of diabetes diagnosis, and were currently using insulin), NHANES 2007-2010.

|                                    | Ever purchased any organic food in the past 30 days |                     |                 |
|------------------------------------|-----------------------------------------------------|---------------------|-----------------|
|                                    | No                                                  | Yes                 | <i>p</i> -value |
| No. of diabetes cases/participants | 680/5,105                                           | 260/2,814           |                 |
| Model 1 †                          | 1.00 (reference)                                    | 0.62 (0.52, 0.74) * | <0.001          |
| Model 2 ‡                          | 1.00 (reference)                                    | 0.79 (0.66, 0.94)   | 0.01            |
| Model 3 §                          | 1.00 (reference)                                    | 0.80 (0.66, 0.96)   | 0.02            |

\* Odds ratio (95% confidence intervals). † Multivariable model 1: adjusted for age (years) and gender. ‡ Multivariable model 2: multivariable model 1 plus race/ethnicity, education, ratio of family income to poverty, family history of diabetes, smoking status, alcohol intake, physical activity, total energy intake, and

HEI-2010 score. § Multivariable model 3: multivariable model 2 plus BMI. All of the covariates were either continuous or categorized as in table 1.

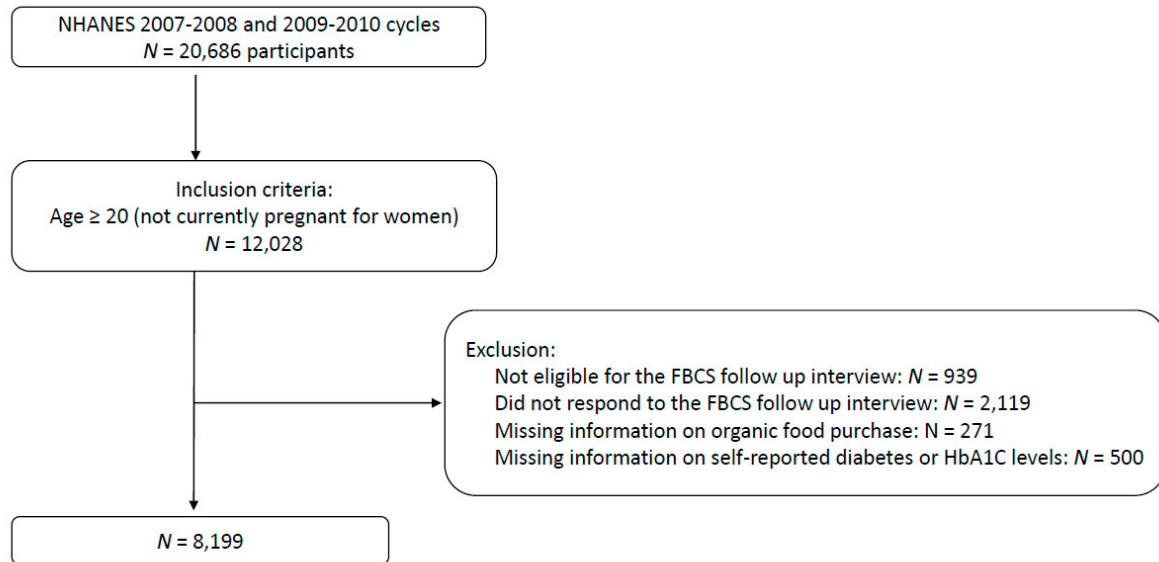

**Figure S1.** Flow chart for participant inclusion and exclusion.
